# Supplementary material for: A Comparative Study on the Efficiency of Two Mycobacterium avium subsp. paratuberculosis (MAP)-Derived Lipopeptides of L3P and L5P as Capture Antigens in an In-House Milk ELISA Test
Source: MDPI journal article supplement (doi:10.3390/vaccines9090997), 2021-09-07
Supplement: s1 [file s1]

**Table S1. Distribution of 47 bulk tank milk (BTM) samples based on their positivity/negativity status in H-MELISA L3P, H-MELISA L5P, commercial ELISA (CMELISA), and milk qPCR IS900 (MqPCR).**

| Number of samples<br>(BTMs) | H-MELISA L3P | H-MELISA L5P | Commercial MELISA<br>(CMELISA) | Milk qPCR IS900<br>(MqPCR) |
|-----------------------------|--------------|--------------|--------------------------------|----------------------------|
| Sample 2                    | -            | +            | +                              | -                          |
| Sample 3                    | -            | -            | +                              | +                          |
| Sample 4                    | -            | +            | -                              | -                          |
| Sample 5                    | -            | +            | +                              | -                          |
| Sample 6                    | +            | -            | +                              | +                          |
| Sample 7                    | -            | +            | +                              | +                          |
| Sample 8                    | -            | -            | +                              | +                          |
| Sample 9                    | -            | -            | -                              | -                          |
| Sample 10                   | -            | +            | +                              | +                          |
| Sample 12                   | -            | +            | -                              | +                          |
| Sample 13                   | -            | +            | +                              | +                          |
| Sample 14                   | -            | +            | -                              | +                          |
| Sample 16                   | -            | +            | +                              | +                          |
| Sample 17                   | +            | +            | -                              | -                          |
| Sample 18                   | -            | +            | +                              | +                          |
| Sample 19                   | +            | -            | +                              | +                          |
| Sample 20                   | -            | +            | -                              | +                          |
| Sample 21                   | -            | -            | -                              | -                          |
| Sample 22                   | -            | +            | -                              | +                          |
| Sample 23                   | +            | +            | -                              | +                          |
| Sample 25                   | +            | +            | +                              | +                          |
| Sample 28                   | +            | +            | -                              | +                          |
| Sample 29                   | -            | +            | -                              | +                          |
| Sample 30                   | +            | +            | -                              | +                          |
| Sample 31                   | -            | +            | -                              | +                          |
| Sample 32                   | -            | +            | -                              | -                          |
| Sample 33                   | +            | +            | +                              | +                          |
| Sample 35                   | -            | +            | -                              | -                          |
| Sample 47                   | +            | +            | +                              | +                          |
| Sample 50                   | -            | +            | -                              | -                          |
| Sample 51                   | -            | +            | -                              | -                          |
| Sample 52                   | +            | +            | -                              | -                          |
| Sample 55                   | -            | +            | -                              | -                          |
| Sample 72                   | -            | +            | -                              | -                          |
| Sample 73                   | +            | -            | +                              | +                          |
| Sample 74                   | +            | -            | +                              | +                          |
| Sample 75                   | -            | +            | +                              | +                          |
| Sample 79                   | -            | -            | +                              | +                          |
| Sample 80                   | -            | -            | +                              | +                          |
| Sample 81                   | -            | -            | -                              | -                          |
| Sample 82                   | +            | -            | -                              | +                          |
| Sample 83                   | -            | -            | -                              | -                          |
| Sample 84                   | -            | -            | +                              | +                          |
| Sample 85                   | -            | -            | -                              | -                          |
| Sample 87                   | -            | -            | -                              | -                          |
| Sample 89                   | -            | -            | -                              | -                          |
| Sample 91                   | -            | +            | -                              | -                          |

**Table S2. Distribution of 81 individual milk samples from a MAP-infected flock (MIF) of sheep based on their positivity/negativity status in H-MELISA L3P, H-MELISA L5P, commercial ELISA (CMELISA), milk qPCR IS900 (MqPCR), serum ELISA (SELISA), and fecal PCR (FPCR).**

| Number of samples<br>(individual milk<br>samples from a<br>MAP-infected flock<br>(MIF)) | H-MELISA L3P | H-MELISA<br>L5P | Commercial<br>MELISA (CMELISA) | Milk qPCR IS900<br>(MqPCR) | Serum ELISA<br>(SELISA) | Fecal PCR<br>(FPCR) |
|-----------------------------------------------------------------------------------------|--------------|-----------------|--------------------------------|----------------------------|-------------------------|---------------------|
| 3                                                                                       | +            | -               | -                              | -                          | -                       | -                   |
| 4                                                                                       | +            | -               | -                              | -                          | -                       | -                   |
| 5                                                                                       | +            | -               | +                              | +                          | -                       | +                   |
| 6                                                                                       | -            | -               | +                              | +                          | +                       | +                   |
| 7                                                                                       | +            | -               | +                              | +                          | +                       | +                   |
| 8                                                                                       | +            | -               | +                              | -                          | +                       | +                   |
| 9                                                                                       | +            | -               | -                              | -                          | -                       | -                   |
| 10                                                                                      | +            | -               | -                              | -                          | -                       | -                   |
| 11                                                                                      | +            | -               | -                              | -                          | -                       | -                   |
| 12                                                                                      | +            | -               | -                              | -                          | -                       | -                   |
| 13                                                                                      | -            | -               | -                              | -                          | -                       | -                   |
| 15                                                                                      | +            | +               | -                              | -                          | -                       | -                   |
| 16                                                                                      | -            | -               | -                              | -                          | -                       | -                   |
| 17                                                                                      | +            | -               | -                              | -                          | -                       | -                   |
| 18                                                                                      | -            | -               | -                              | -                          | -                       | -                   |
| 19                                                                                      | -            | -               | -                              | -                          | -                       | -                   |
| 20                                                                                      | -            | -               | -                              | -                          | -                       | -                   |
| 22                                                                                      | +            | -               | +                              | -                          | +                       | -                   |
| 23                                                                                      | +            | -               | -                              | -                          | -                       | -                   |
| 24                                                                                      | +            | -               | -                              | -                          | -                       | -                   |
| 25                                                                                      | +            | +               | +                              | -                          | +                       | -                   |
| 27                                                                                      | +            | -               | -                              | -                          | -                       | -                   |
| 28                                                                                      | -            | -               | -                              | -                          | -                       | -                   |
| 29                                                                                      | +            | +               | -                              | -                          | -                       | -                   |
| 33                                                                                      | +            | -               | -                              | -                          | -                       | -                   |
| 35                                                                                      | +            | -               | -                              | -                          | -                       | -                   |
| 36                                                                                      | +            | -               | +                              | -                          | +                       | +                   |
| 37                                                                                      | -            | -               | -                              | -                          | -                       | -                   |
| 38                                                                                      | +            | +               | +                              | -                          | +                       | -                   |
| 39                                                                                      | -            | -               | -                              | -                          | -                       | -                   |
| 41                                                                                      | +            | -               | -                              | -                          | -                       | -                   |
| 45                                                                                      | -            | -               | -                              | -                          | -                       | -                   |
| 49                                                                                      | -            | -               | +                              | -                          | -                       | -                   |
| 50                                                                                      | +            | +               | -                              | -                          | +                       | -                   |
| 53                                                                                      | +            | +               | +                              | -                          | +                       | -                   |
| 55                                                                                      | -            | +               | +                              | -                          | +                       | -                   |
| 56                                                                                      | -            | -               | -                              | -                          | +                       | -                   |
| 61                                                                                      | +            | -               | -                              | -                          | -                       | -                   |
| 62                                                                                      | +            | +               | +                              | +                          | +                       | -                   |
| 64                                                                                      | +            | -               | -                              | +                          | +                       | +                   |
| 65                                                                                      | +            | +               | -                              | +                          | -                       | -                   |
| 66                                                                                      | +            | -               | -                              | -                          | -                       | -                   |
| 67                                                                                      | +            | -               | -                              | -                          | -                       | -                   |
| 69                                                                                      | -            | -               | +                              | +                          | +                       | -                   |
| 70                                                                                      | +            | -               | +                              | -                          | +                       | -                   |
| 72                                                                                      | +            | -               | +                              | +                          | +                       | +                   |
| 73                                                                                      | +            | -               | -                              | -                          | -                       | -                   |

|     |   |   |   |   |   |   |
|-----|---|---|---|---|---|---|
| 75  | - | - | - | + | - | - |
| 76  | - | - | - | + | - | - |
| 78  | + | + | - | - | - | - |
| 79  | + | + | - | - | - | - |
| 80  | + | - | - | - | - | - |
| 81  | + | + | - | - | - | - |
| 82  | + | + | + | - | + | + |
| 83  | + | + | - | + | - | - |
| 84  | + | + | - | - | - | - |
| 86  | + | + | - | + | - | - |
| 88  | + | - | - | - | + | - |
| 89  | + | - | - | - | - | - |
| 90  | + | + | - | - | - | - |
| 91  | + | - | - | - | - | - |
| 92  | + | - | - | - | - | - |
| 93  | - | - | + | + | + | - |
| 94  | - | + | + | + | + | - |
| 95  | + | + | + | - | + | - |
| 96  | - | - | + | - | + | - |
| 97  | + | + | - | - | + | - |
| 99  | + | - | - | + | - | - |
| 100 | + | - | - | + | - | - |
| 101 | + | - | - | - | - | - |
| 102 | + | - | - | - | - | - |
| 103 | - | - | - | - | - | - |
| 104 | - | - | - | - | - | - |
| 105 | + | + | - | - | - | - |
| 111 | - | - | - | - | - | - |
| 112 | + | + | + | + | + | - |
| 113 | + | + | - | + | - | - |
| 114 | - | + | + | + | + | - |
| 119 | - | + | + | - | + | - |
| 121 | + | + | - | - | - | - |
| 128 | - | - | - | - | - | - |
